# Supplementary material
Source: publisher figshare collection journal article supplement (https://acs.figshare.com/ndownloader/files/4136056)
Supplement: Supplementary file 1 [file 4136056]

Supporting Information for

***SYNTHESIS AND CYTOTOXICITY STUDIES OF SILYL-SUBSTITUTED TITANOCENE DICHLORIDE DERIVATIVES***

Anthony Deally, Frauke Hackenberg, Grainne Lally, Helge Müller-Bunz and Matthias  
Tacke\*

*UCD School of Chemistry and Chemical Biology*

*Centre for Synthesis and Chemical Biology (CSCB)*

*Conway Institute of Biomolecular and Biomedical Research*

*University College Dublin, Belfield, Dublin 4, Ireland*

**Crystallographic Analyses:** A single crystal of titanocene **3a** suitable for X-ray diffraction experiments was obtained by the slow diffusion of pentane into saturated solutions of the compound in chloroform, whereas a single crystal of **3b** was obtained by the slow evaporation of chloroform from a saturated solution at 25 °C. X-ray diffraction data for **3a** and **3b** was collected on an Agilent Technologies (former Oxford Diffraction) Super Nova A diffractometer at 100 K. **3a** was measured with Mo-K $\alpha$  (0.71073 Å), **3b** with Cu-K $\alpha$  (1.54184 Å). A complete dataset was collected, assuming that the Friedel pairs are not equivalent. An analytical absorption correction based on the shape of the crystal was performed. The crystal structure was then solved by direct methods (SHELXS-97) and refined by full matrix least squares methods against F<sup>2</sup> (SHELXL-97). Crystal data, data collection parameters, and results of the analyses are listed in Table 1.

Table 1. Crystal data and structure refinement for **3a** and **3b**.

| Identification code               | <b>3a</b>                                                          | <b>3b</b>                                                                         |
|-----------------------------------|--------------------------------------------------------------------|-----------------------------------------------------------------------------------|
| Empirical formula                 | C <sub>26</sub> H <sub>30</sub> Si <sub>2</sub> Cl <sub>2</sub> Ti | C <sub>28</sub> H <sub>34</sub> O <sub>2</sub> Si <sub>2</sub> Cl <sub>2</sub> Ti |
| Formula weight                    | 517.48                                                             | 577.53                                                                            |
| Temperature                       | 100(2) K                                                           | 100(2) K                                                                          |
| Wavelength                        | 0.71073 Å                                                          | 1.54184 Å                                                                         |
| Crystal system                    | Orthorhombic                                                       | Monoclinic                                                                        |
| Space group                       | Pbca (#61)                                                         | C2/c (#15)                                                                        |
| Unit cell dimensions              | a = 13.2693(3) Å $\alpha$ = 90°.                                   | a = 27.1091(4) Å $\alpha$ = 90°.                                                  |
|                                   | b = 18.6775(4) Å $\beta$ = 90°.                                    | b = 6.80307(8) Å $\beta$ = 101.4316(13)°.                                         |
|                                   | c = 20.5498(4) Å $\gamma$ = 90°.                                   | c = 31.1056(4) Å $\gamma$ = 90°.                                                  |
| Volume                            | 5093.01(19) Å <sup>3</sup>                                         | 5622.85(13) Å <sup>3</sup>                                                        |
| Z                                 | 8                                                                  | 8                                                                                 |
| Density (calculated)              | 1.350 Mg/m <sup>3</sup>                                            | 1.364 Mg/m <sup>3</sup>                                                           |
| Absorption coefficient            | 0.652 mm <sup>-1</sup>                                             | 5.331 mm <sup>-1</sup>                                                            |
| F(000)                            | 2160                                                               | 2416                                                                              |
| Crystal size                      | 0.3139 x 0.2082 x 0.1456 mm <sup>3</sup>                           | 0.1875 x 0.1285 x 0.0273 mm <sup>3</sup>                                          |
| Theta range for data collection   | 2.85 to 27.13°.                                                    | 3.33 to 62.45°.                                                                   |
| Index ranges                      | -16 ≤ h ≤ 16, -19 ≤ k ≤ 23, -26 ≤ l ≤ 25                           | -27 ≤ h ≤ 30, -7 ≤ k ≤ 7, -35 ≤ l ≤ 34                                            |
| Reflections collected             | 34736                                                              | 23610                                                                             |
| Independent reflections           | 5585 [R(int) = 0.0385]                                             | 4461 [R(int) = 0.0335]                                                            |
| Completeness to theta = 26.43°    | 99.1 %                                                             | 99.8 %                                                                            |
| Absorption correction             | Analytical                                                         | Analytical                                                                        |
| Max. and min. transmission        | 0.925 and 0.869                                                    | 0.862 and 0.495                                                                   |
| Refinement method                 | Full-matrix least-squares on F <sup>2</sup>                        | Full-matrix least-squares on F <sup>2</sup>                                       |
| Data / restraints / parameters    | 5585 / 0 / 284                                                     | 4461 / 0 / 322                                                                    |
| Goodness-of-fit on F <sup>2</sup> | 1.035                                                              | 1.050                                                                             |
| Final R indices [I > 2σ(I)]       | R1 = 0.0293, wR2 = 0.0637                                          | R1 = 0.0270, wR2 = 0.0690                                                         |
| R indices (all data)              | R1 = 0.0415, wR2 = 0.0699                                          | R1 = 0.0331, wR2 = 0.0712                                                         |
| Largest diff. peak and hole       | 0.371 and -0.348 e.Å <sup>-3</sup>                                 | 0.502 and -0.267 e.Å <sup>-3</sup>                                                |
